# Supplementary material for: Polymer imprinting with iron-oxo-hydroxo clusters: [Fe6O2(OH)2(O2CC(Cl)CH2)12(H2O)2], [Fe6O2(OH)2(O2C–Ph–(CH)CH2)12(H2O)2] and [{Fe(O2CC(Cl)CH2)(OMe)2}10]
Source: Royal Society of Chemistry journal article supplement (doi:10.1039/c1dt11614b), 2011-11-17
Supplement: c1dt11614b.pdf [file c1dt11614b.pdf]

## Supplementary information

Figure S1: Phase-shifted Fourier transform of **1** (left) and EXAFS spectrum of **P-1** (right)

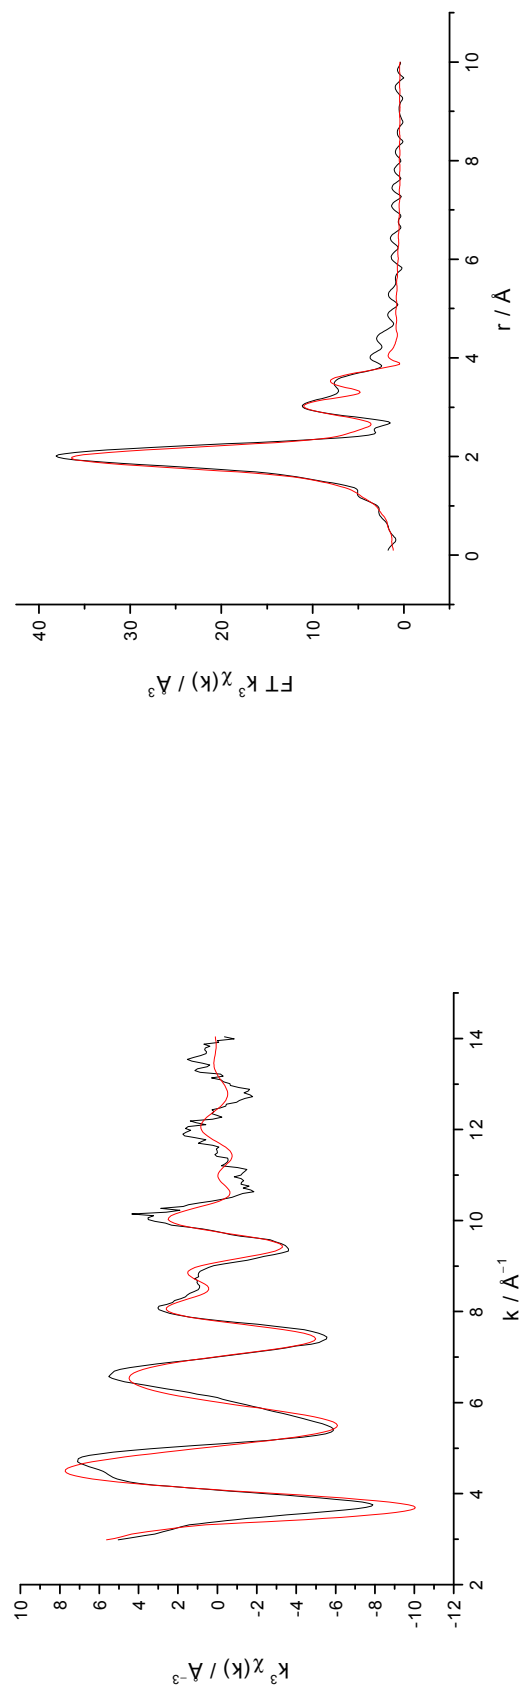

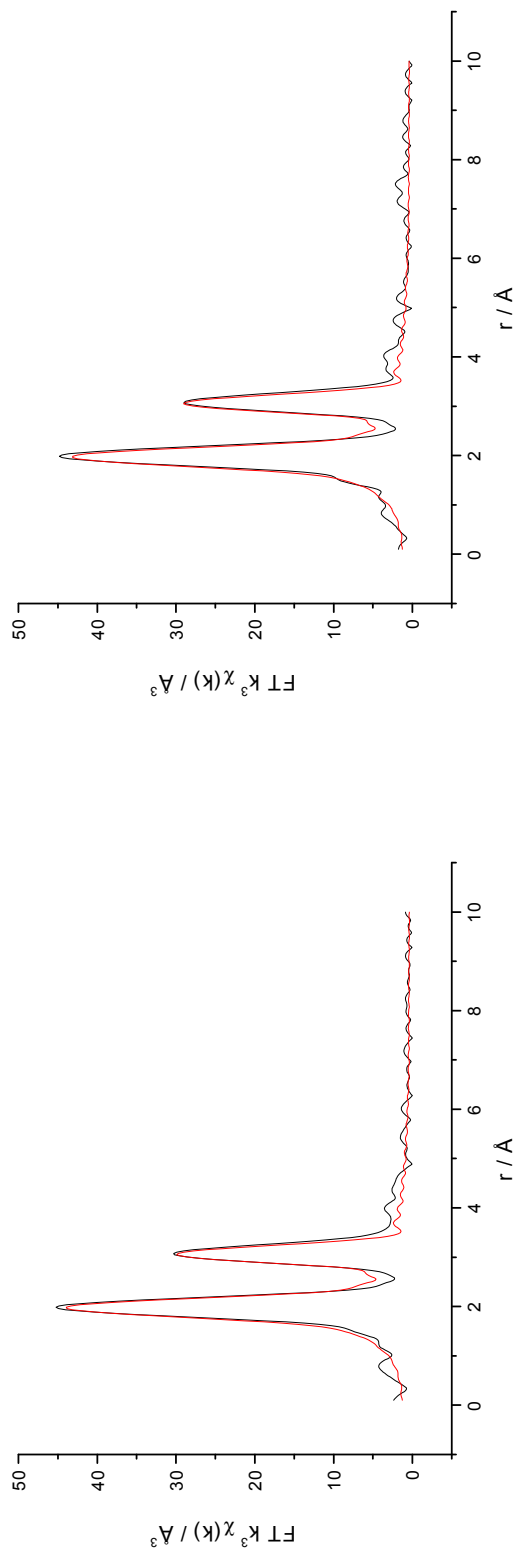

**Figure S2:** The EXAFS analysis (phase-shifted Fourier transforms) of left) **2** and right) **E-2**. Red line is theoretical fit, black line is experiment.

**Figure S3.** ORTEP (50% probability ellipsoids) of iron-oxo-hydroxo core (i.e. carbon/hydrogen atoms of vinylbenzoate ligands, solvent and hydrogens removed for clarity) of **3**, note that the centre of the cluster sits on a crystallographic 2-fold axis. 50% of the atoms in this unit depicted by the asterisk are generated by:  $x, -y+1/2, -z+1/2$

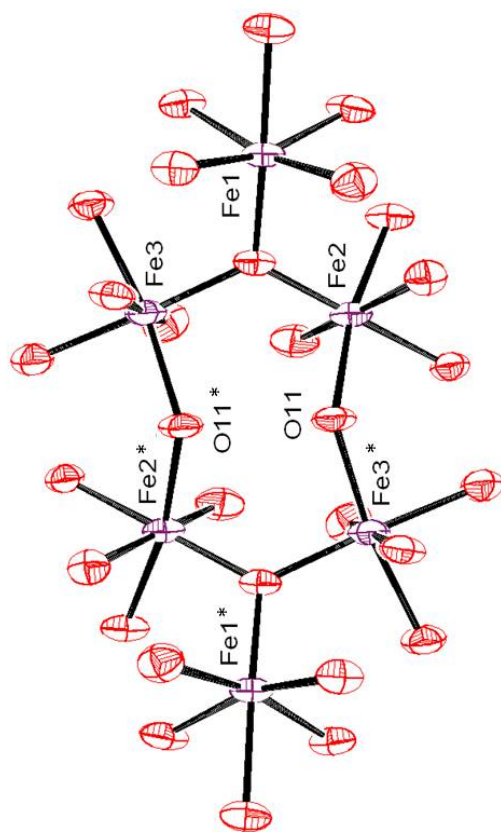

## Supplementary Information:

### DRUV spectra

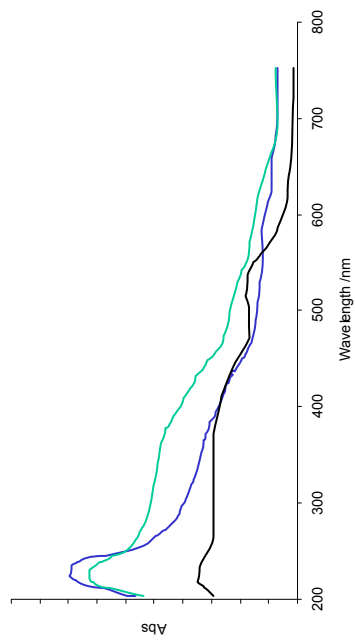

Black = 1  
Green = E1  
Blue = E1 + acid

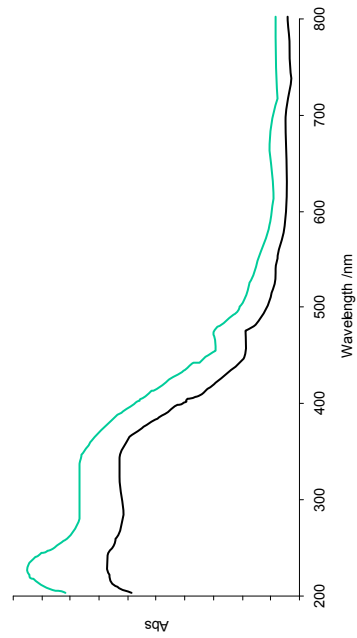

Black = 2  
Green = E2

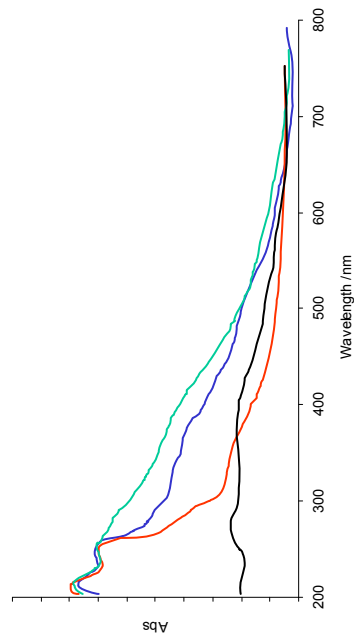

Black = 3  
Green = E3  
Blue = ER3  
Red = E3 + acid
